# Review on global change status and its impacts on the Tibetan Plateau environment

Aamir Latif<sup>1,2</sup>, Sana Ilyas<sup>2,3</sup>, Yangjian Zhang<sup>1,4,\*</sup>, Yuqin Xin<sup>5</sup>,  
Lin Zhou<sup>6</sup> and Quan Zhou<sup>6</sup>

<sup>1</sup> Key Laboratory of Ecosystem Network Observation and Modelling, Institute of Geographic Sciences and Natural Resources Research, Chinese Academy of Sciences, Beijing 100101, China

<sup>2</sup> University of Chinese Academy of Sciences, Beijing 100049, China

<sup>3</sup> Key Laboratory of Regional Climate-Environment for Temperate East Asia, Institute of Atmospheric Physics, Beijing 100029, China

<sup>4</sup> Center for Excellence in Tibetan Plateau Earth Sciences, Chinese Academy of Sciences, Beijing 100101, China

<sup>5</sup> Sanmenxia Academy of Environmental Sciences, Sanmenxia 472000, China

<sup>6</sup> Southwest Branch of State Grid Corporation of China, Chengdu 610094, China

\*Correspondence address. Key Laboratory of Ecosystem Network Observation and Modelling, Institute of Geographic Sciences and Natural Resources Research, Chinese Academy of Sciences, Beijing 100101, China. Tel/Fax: +86-10-6488-9703; E-mail: [zhangyj@igsrr.ac.cn](mailto:zhangyj@igsrr.ac.cn)

## Abstract

The Tibetan Plateau (TP) holds fundamental ecological and environmental significances to China and Asia. The TP also lies in the core zone of the belt and road initiative. To protect the TP environment, a comprehensive screening on current ecological research status is entailed. The teased out research gap can also be utilized as guidelines for the recently launched major research programs, i.e. the second TP scientific expedition and silk and belt road research plan. The findings showed that the TP has experienced significant temperature increase at a rate of 0.2°C per decade since 1960s. The most robust warming trend was found in the northern plateau. Precipitation also exhibited an increasing trend but with high spatial heterogeneity. Changing climates have caused a series of environmental consequences, including lake area changes, glacier shrinkage, permafrost degradation and exacerbated desertification. The rising temperature is the main reason behind the glaciers shrinkage, snow melting, permafrost degradation and lake area changes on the TP and neighboring regions. The projected loss of glacial area on the plateau is estimated to be around 43% by 2070 and 75% by the end of the century. Vegetation was responsive to the changed environments, varied climates and intensified human activities by changing phenology and productivity. Future global change

study should be more oriented toward integrating various research methods and tools, and synthesizing diverse subjects of water, vegetation, atmosphere and soil.

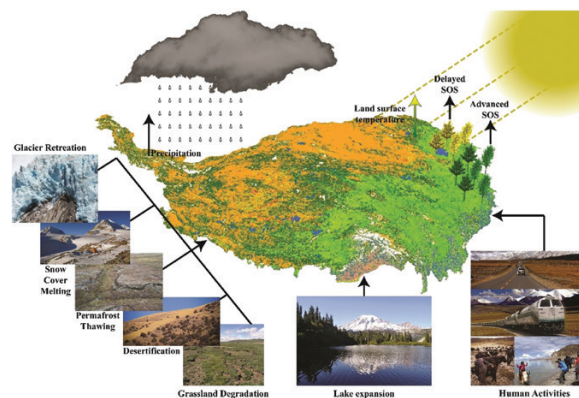

**Keywords:** Tibetan Plateau, silk and belt road, climate change, human activities, environmental consequences

Received: 30 November 2018, Revised: 17 May 2019, Accepted: 15 July 2019

## INTRODUCTION

The Tibetan Plateau (TP), the biggest and highest elevation plateau in the world, covers an area of about  $2.6 \times 10^6$  km<sup>2</sup> (Li *et al.* 2018b). It stretches from Pamir to Hindu Kush in the west, and Hengduan in the east. From north it is attached with

Kunlun and Qilian mountains and to the south with Himalayas. The TP is named as ‘Third Pole’ or ‘Roof of the world’ because of its influential land surface process and strong interactions with atmosphere, cryosphere, hydrosphere and biosphere (Yao

*et al.* 2012a). The plateau is the origin of many Asian rivers such as Brahmaputra, Ganges, Indus, Mekong, Yangtze and Yellow river and is also known as ‘Asian water tower’ (Xu *et al.* 2008b). It is estimated that the TP provides natural resources to >1.5 billion people in the form of fresh water, pasture and timber (Fig. 1).

Climatic conditions in this region have drastically changed since the middle of 20th century (Moors *et al.* 2011) and shifted the ecological conditions on the TP (Wang *et al.* 2007). Additionally, heightened anthropogenic activities have been observed on the TP (Agarwal 2009). The recent global change has impacted regional environment of the plateau to an unprecedented level, potentially threatening the livelihood of its inhabitants in the near future.

The plateau also exerts strong thermal influences on the regional and global climate system by isotropic, thermal and anthropogenic forcings (Duan and Wu 2005; Yanai *et al.* 1992; Yang *et al.* 2014). The TP not only influences the atmospheric circulation in the region but also affects the climate pattern of the globe (Fig. 2). Due to its strong effects on adjacent and remote regions (Xu *et al.* 2015; Yao *et al.* 2013; Zhao *et al.* 2015), understanding the dynamics of cryosphere, hydrosphere and vegetation dynamics on the TP is crucial (Cleland *et al.* 2007; Garonna *et al.* 2016; Morissette *et al.* 2009; Peñuelas *et al.* 2009).

The TP and the adjacent central Asia plateau lie in the center of the silk and belt road initiative, which is an international cooperation development plan initiated by China. To provide scientific basis for a sustainable silk and belt road plan, full understanding on the environmental conditions and future change is imperative. To meet these needs, Chinese national government launched the second scientific expedition, which aims to apply innovative investigation technique and

tools to evaluate environmental changes on the TP in the past 40 years. Also Chinese Academy of Sciences initiated the level A strategic scientific research plan, which was designed to understand impacts of global change on the TP environment. In advocating these several unprecedented major scientific projects, it is entailed to comb through current research status on the TP and point out new research directions. The objective of this review was to summarize global change status and its impacts on environments of the plateau. The impacts include on glaciers, snow cover, hydrological processes, permafrost degradation and vegetation. Only with a thorough review, our research knowledge gap could be teased out and future research foci could be clarified.

## OBSERVED CLIMATIC FACTORS ON THE TP

### Surface air temperature

Temperature is the most commonly studied climatic factor on the TP due to its fundamental significances. To date, generally accepted viewpoint is about its overall mean and spatial pattern. The annual mean temperature observed on the TP is <0°C. Across the entire TP, temperature exhibits a high spatial heterogeneity, and it decreases from east to west (Sun *et al.* 2015). Over the last several decades, the TP is significantly affected by global warming and exhibited a uniform warming trend (Gao *et al.* 2015a). From the mid-20th century, temperature on the TP has increased by 1.8°C (Wang *et al.* 2008), with a warming rate 1.5 times the global average (Yao *et al.* 2012a; Zhang *et al.* 2013). For separate periods, temperature showed

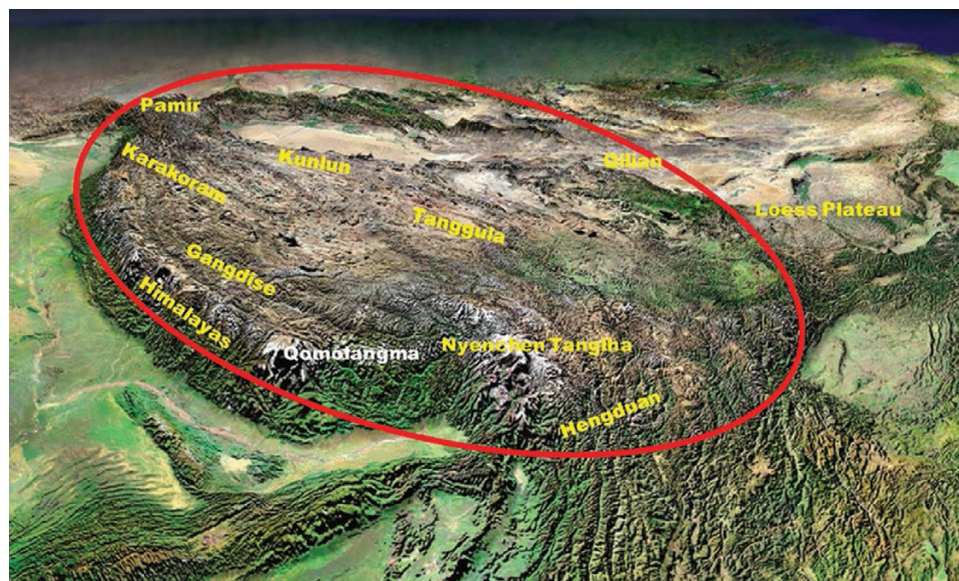

**Figure 1:** the geographical location of Tibetan Plateau, stretches from Pamir and Hindu Kush in the west to the Hengduan Mountains in the east from the Kunlun and Qilian mountains in the north to the Himalayas in the South. (Yao *et al.* 2012a).

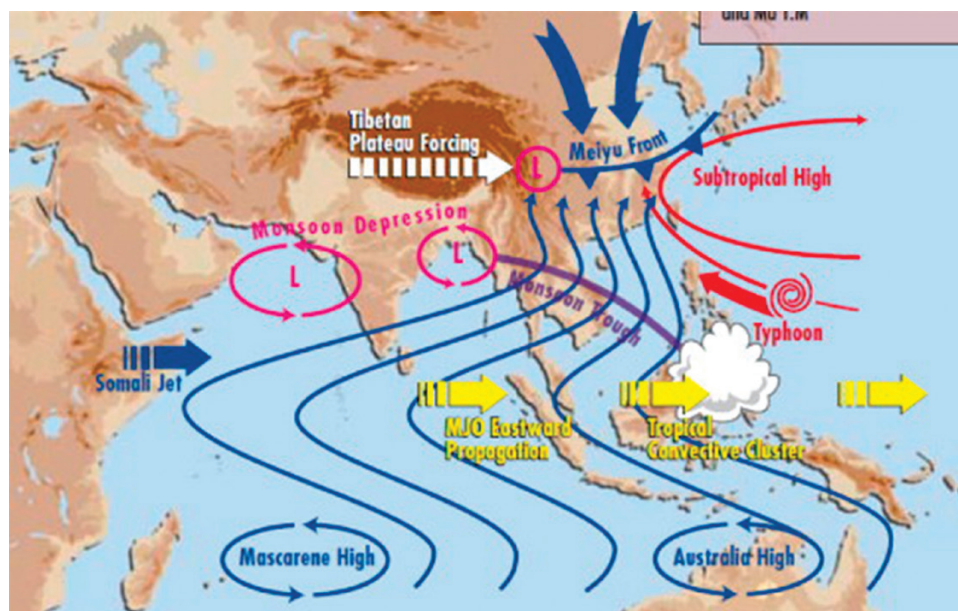

**Figure 2:** atmospheric circulation pattern influencing TP from summer monsoon. Water pattern is associated with the tropical and subtropical areas with the Tibetan Plateau force. Note: L represents low pressure cyclonic core (Yao et al. 2012a).

stability during 1970s, significantly increased during 1980s and drastically increased since 1990s (Zhang et al. 2014).

Observation data showed that mean annual air temperature increased at a rate of 0.25°C/decade during 1961–2014. The winter temperature increased twice the mean annual value (You et al. 2010, 2013), and winter and autumn showed faster warming trends than spring and summer (Kuang et al. 2016). Model based studies showed a shrink of  $-0.20^{\circ}\text{C}/\text{annum}$  in diurnal-night temperature range during 1961–2013 due to a higher warming rate at night (You et al. 2016a) and this trend is predicted to continue in the near future (Zhu et al. 2013). Warming on the TP started earlier than other regions of China and Polar regions of the world (Liu and Chen 2000). Extended to a long temporal dimension, results from the ice core records revealed that climate varied more widely in the TP than Greenland and other cold regions of the world (Thompson et al. 1997).

Numerous studies have been conducted on the TP about the temperature changes in the past decades (Table 1). Each study reported discrepant temperature increasing values, and the conclusion about the faster temperature increasing rate on the TP than the Northern Hemisphere is also preliminary. Whether the warming hiatus exists is also still illusive. The main reason is because that each study relies on distinct datasets and targeted different periods. In the future study, a comprehensive field observation and remote sensing data integration is imperative. By this integration, the data scarcity in the remote west TP can be surmounted to a certain degree.

### Variable precipitation

Precipitation is the key source of water on this planet and it holds paramount importance for life existence on the Earth.

It also plays a profound role in the energy balance, hydrological cycle and terrestrial ecosystem sustainability by affecting the biological, hydrological and ecological processes (Wan et al. 2017). Different from temperature, the trend of precipitation has not been as apparent. Due to the scarcity and low accuracies of remote sensed precipitation data, research findings about precipitation are composed of considerable controversies.

The conclusion about its spatial pattern is unanimous. The meteorological station and remote sensing data both showed that annual mean precipitation exhibits a spatial pattern of decreasing from southeast to northwest (You et al. 2015). The precipitation also varied strongly with season. The summer precipitation (June–September) consists of 60–90% while the winter precipitation (December–February) accounts for <10% of the annual total (Xu et al. 2008a). The southern edges of Himalayas and the other widespread valleys receive large amount of convective precipitation (Fig. 3).

Temporally, the TP precipitation does not show a uniform increasing or decreasing trend (Gao et al. 2015a; Tong et al. 2014b; You et al. 2015). The precipitation increasing rate calculated over a 55-year period for the entire plateau is 3.8 mm/decade (Wan et al. 2017). The variable precipitation trend is significantly characterized by the regional physiognomies. The studies based on meteorological stations observation and simulations showed that the TP received yearly increasing precipitation in the northeast, central and southwest regions (Gao et al. 2015a, 2015b; Li and Xue 2010; Wang et al. 2014), while southeastern plateau has shown a decreased annual precipitation trend (Kuang and Jiao 2016).

Indian monsoon, Asian monsoon, and block effects from complex mountain chain on the TP all exert influences on

**Table 1:** warming trend on the Tibetan Plateau since the mid of 20th century

| Number | Time period | Number of stations | Warming trend (°C per decade) | Reference                      |
|--------|-------------|--------------------|-------------------------------|--------------------------------|
| 1      | 1955–1996   | 197                | 0.16                          | Liu and Chen (2000)            |
| 2      | 1957–2000   | 161                | 0.16                          | Frauenfeld <i>et al.</i> 2005) |
| 3      | 1971–2000   | 77                 | 0.20                          | Wu <i>et al.</i> (2007)        |
| 4      | 1961–2000   | 43                 | 0.24                          | Rangwala <i>et al.</i> (2009)  |
| 5      | 1961–2003   | 71                 | 0.25                          | Duan and Wu (2006)             |
| 6      | 1961–2003   | 64                 | 0.28                          | Duan <i>et al.</i> (2006)      |
| 7      | 1966–2003   | 75                 | 0.28                          | Zhang (2007)                   |
| 8      | 1961–2004   | 71                 | 0.25                          | You <i>et al.</i> (2010)       |
| 9      | 1961–2005   | 71                 | 0.27                          | You <i>et al.</i> (2016b)      |
| 10     | 1970–2005   | 75                 | 0.31                          | Liu <i>et al.</i> (2011)       |
| 11     | 1961–2007   | 72                 | 0.28                          | Guo and Wang (2012)            |
| 12     | 1961–2007   | 90                 | 0.36                          | Wang <i>et al.</i> (2008)      |
| 13     | 1960–2008   | 63                 | 0.25                          | Song <i>et al.</i> (2014b)     |
| 14     | 1970–2009   | 75                 | 0.34                          | Xie and Zhu (2013)             |
| 15     | 1984–2009   | 97                 | 0.67                          | Zhang <i>et al.</i> (2013)     |
| 16     | 1981–2010   | 80                 | 0.50                          | Yin <i>et al.</i> (2013)       |
| 17     | 1957–2012   | 49 to 95           | 0.36                          | Zhang <i>et al.</i> (2014)     |
| 18     | 1970–2012   | 26                 | 0.36                          | Xie <i>et al.</i> (2015)       |
| 19     | 1971–2015   | 88                 | 0.30                          | Liu <i>et al.</i> (2017)       |

Modified from (Kuang *et al.* 2016).

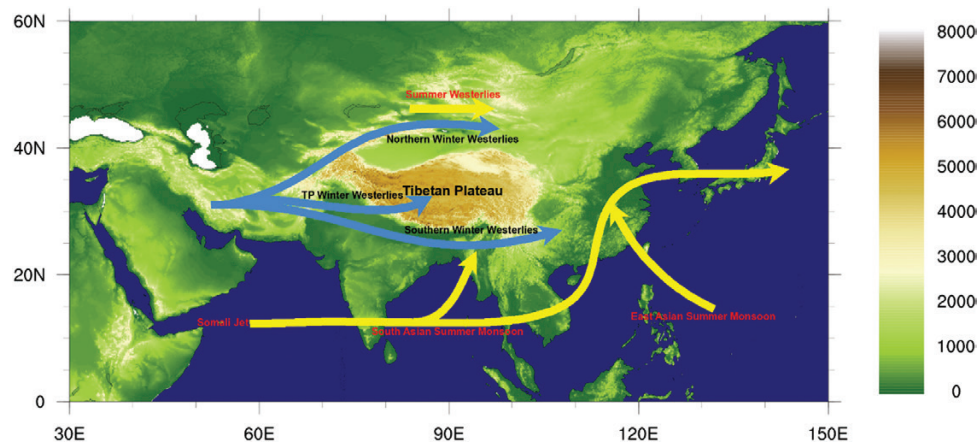

**Figure 3:** atmospheric circulation system influencing TP from different geographical locations. Yellow arrows indicating summer monsoon while blue winter monsoon (Yang *et al.* 2014).

precipitation pattern on the TP, thereby a heterogeneous spatial pattern. The TP is influenced primarily by East and South Asian monsoon, as well as westerlies to a modest extent. As a result, the TP gets wetting episodes during monsoon seasons (Yang *et al.* 2008). Land surface processes also feedback to climates. Heavy precipitation in the form of snowfall can slow down summer monsoon on TP (Liu *et al.* 2004). Warming

trend on the plateau has increased the atmospheric water holding capacity and results in high precipitation in some parts of the plateau (Trenberth 2011). But precipitation is also affected by many other factors, e.g. increasing CO<sub>2</sub>, North Atlantic Oscillation and El Niño (Dai 2013). As a whole, warming did not cause pronounced precipitation increment on the TP since 1980s (Fang *et al.* 2015).

Due to the remoteness and inaccessible terrain of the TP, meteorological stations are insufficient and sparsely distributed. Currently, most of the meteorological stations are located in central and eastern TP (semi-arid and humid region) while only few are in the western part (arid region). The development in the satellite remote sensing technology has provided an unprecedented opportunity to monitor precipitation in this environmentally harsh region. To date, remotely sensed data have been widely used to monitor precipitation pattern on the TP, which greatly increased the data accuracies (Bai et al. 2008; Fujinami and Yasunari 2001; Ma et al. 2016; Tong et al. 2014a; Wang et al. 2014). The spatial pattern of precipitation on the TP is quite complicated and the magnitude from each causing factor is difficult to quantify. To increase the accuracies of monitoring and prediction, there are several pending issues awaiting to be resolved: (i) generating new precipitation data series by integrating multiple sources of data, including remote sensing data and field observation data; (ii) tracking water vapor movement pathway from the southeastern TP; (iii) separating the contribution of local evapotranspiration and water vapor influx from outside the TP to precipitation formation on the TP; and (iv) setting up site monitoring equipment to increase the density of field measurements.

## STRENGTHENED HUMAN ACTIVITIES

Due to the roughness and harsh environments of the plateau, it is speculated that human settled on the TP ~20 000 years ago, when the presence of worked stones, handprints and footprints were discovered >4200 m.a.s.l. in the southern parts of the TP (Aldenderfer 2011). Agropastoral was thought to be the main source of living over the high elevated regions (Chen et al. 2015). After thousands of years, the plateau population reached ~12 million nowadays. This population increasing rate is higher than that of the entire China (Zhang et al. 2005). The number of tourists has also exponentially increased from 3530 to 6 851 400 during 1980–2010 in Xizang province. In Qinghai province, the tourists increased from 3 209 592 to 20 056 000 during 2000–14 (Chung et al. 2018). Livestock in Xizang grew from 955 000–2 349 000 during 1951–2010 (Yu et al. 2012).

All human activities are spatially heterogeneous on the TP. For example, the livestock grazing occurs across the TP but high grazing pressure is exerted on regions down valleys and around human settlements. Such a spatial heterogeneity of human activities set the stage for spatially varied responses of ecosystems (Li et al. 2019). However, it is difficult to separate out effects of human activities on ecosystems and this knowledge is crucial for ecosystem management (Feng et al. 2017; Wang et al. 2016b).

In the future studies, the following pathways entail immediate attentions. First, livestock grazing pressure needs to be spatially explicit mapped. The current livestock amount is recorded for each county and each county in the TP is too

large to make effective analysis of livestock effects on ecosystems. Second, fences locations are needed to be mapped. Grazing exclusion by fence is commonly applied on the TP. We can hypothesize that vegetation dynamics in fenced regions are mostly driven by climates, while ecosystems outside are regulated by both human activities and climates. But only with spatially explicit distribution of grazing fences, can we separate the relative effects of climate changes and human activities.

## IMPACTS OF CLIMATIC CHANGE ON THE CRYOSPHERIC COMPONENTS OF THE TP

### Glaciers

The TP has third largest concentration of glaciers after Polar Regions in the world, containing 84% glacial of China (Liu and Chen 2000). The TP is the 'water tower' of Asia and the glaciers provide the majority of water sources. Mountain glacier status is also an indicator of climate changes. The monitoring results from a variety of sources revealed that the total number of glaciers on the TP is >36 973, covering an area of ~49 873 km<sup>2</sup> and with a total volume of ~5600 km<sup>3</sup> (Yao et al. 2007).

Extensive glacier melting has occurred on the TP since the middle of last century and it accelerated since late 1980s. The glacier retreat exhibited a strong spatial heterogeneity on the TP. The retreat rate is comparatively low in the interior plateau, medium at the lower elevated margins and maximum at high elevated edges (Yao et al. 2007). Spatially, the rate of glacial retreat wanes from southeastern TP to central TP, although the negative trend appears on both sides. The greatest retreat was found in the Himalayas mountain region, followed by continental interior and the least in the eastern Pamir (Yao et al. 2012b). Such systematic variations are due to increasing temperature and less precipitation on the Himalayas and high precipitation on the eastern Pamir along with varied atmospheric circulation processes (Yao et al. 2012b). It is projected that the TP would lose 43% of its total glacial by 2070 and 75% by the end of this century, respectively (Maclean 2009). Accelerated glacier retreat results in increased frequent flooding (Lee et al. 2013; Wang et al. 2013a; Yao et al. 2012a).

Rising temperature plays a crucial role in causing the glacial shrinkage on the TP and surrounding regions (Scherler et al. 2011; Zhang et al. 2017a). Temperature increases in a greater magnitude along rising altitude and the increasing rate reaches the highest between 4800 and 6200 m a.s.l. (Qin et al. 2009), which marks as the ablation zone for most glaciers on the plateau. Precipitation decreased in Himalayas region, while eastern Pamir received more precipitation. Besides increasing temperature and precipitation anomalies, black carbon is also a necessary element in causing glacier melting by modifying surface albedo and energy balance (Menon et al. 2010).

Glacier retreat has caused various hydrological process changes, such as increased river runoff and lake volumes, along with higher probability of natural disasters, such as ice avalanches or flooding (Faillietaz *et al.* 2015; Haeberli *et al.* 2017; Yao *et al.* 2004). To protect and retard its retreat, it is imperative to monitor the spatial-temporal patterns of glaciers and dig into the causing factors. To reach these goals, the following points are pressing in the future glacier researches: (i) introducing new techniques to monitor glacier area, depth and volume changes. Previous monitoring has been focused on area change. Recently, developed techniques make glacier depth and volume measurement possible; (ii) gathering historical photo and documents and extend the past coverage of glacier records; (iii) establishing fixed and long-term environmental change stations to monitor environmental changes related to glaciers; (iv) monitoring closely environmental change outside China, industry development in Southern Asia has transported massive pollution, such as black carbon to the TP and accelerate the glacier melting.

### Snow cover

Snow is an essential and delicate part of cryosphere. It plays a dominant role in maintaining the hydrological cycles and also controls the seasonal distribution of water supplies in arid and semi-arid areas of the plateau (Ma *et al.* 2011). Snow is related to a wide range of land features, such as glacier area changes, glacial lakes outburst and lake area variations (Zhang *et al.* 2012). The TP contains third largest snow-covered area after Polar Regions in the world. Snow cover on the TP is strongly sensitive to climate change and also provides feedback to climates, implicating its robust and strong interactions with atmosphere, hydrosphere and biosphere. Thus, it is crucial to timely monitor responses of snow cover to climate variations on the plateau (Tang *et al.* 2013b).

Previous researches concluded that snow cover change has occurred on the TP in the past several decades, but plenty of variations remain. Snow cover is regulated by temperature and precipitation on the entire TP or at an individual river basin. Some studies revealed slightly positive trend in snow covered area prior to 1997 utilizing ground and satellite data (Li and Yanai 1996; Qin *et al.* 2006), while the trend turned during 1997–2012 (Ma *et al.* 2011; Pu *et al.* 2007; Shen *et al.* 2015; Su *et al.* 2016). Spatially, high snow cover was found on the southern and western edges of the plateau, which receives moist air transported by East Asian monsoon (Li *et al.* 2018b).

Snow affects surface processes through changing surface energy balance (Qu and Hall 2014). Albedo acts as a pivotal interaction media between surface and local climates.

Based on the Coupled Model Intercomparison Project versions 3 (CMIP3) and 5 (CMIP5) (Guo *et al.* 2018), an increasing absorption of solar radiations due to decreased snow albedo amplified snow cover effects at high elevated regions of the TP (Wang *et al.* 2015). The snow–albedo relationship is highly

influenced by several factors, such as snow grain size, solar zenith angle, liquid water content, snow impurities, layer structure in the snowpack, snow depth and so on. Out of these factors, snow grain size is found the key factor regulating snow–albedo relationship (Aoki *et al.* 2011; Flanner *et al.* 2007).

The recent advancement in satellite technology boosts snow cover monitoring for the remotely inaccessible and physically hostile regions (Rittger *et al.* 2013; Tang *et al.* 2013a; Yang *et al.* 2015). Different remote sensing products have been used to monitor snow cover changes over the entire TP. Comparatively, MODIS products have shown higher accuracies than the Interactive Multisensor Snow and Ice Mapping System (IMS) products, with an overall accuracy higher than 91% in accordance with field station data (Yang *et al.* 2015). Due to lack of ground observation data, results of various remote sensing data contain much spatiotemporal uncertainty. It is strongly recommended to use land surface models coupled with remote sensing observations in monitoring snow cover change on the plateau. Only integration of multiple data sources could we increase monitoring accuracies, and facilitate our predicting future snow cover conditions under different climate scenarios.

### Permafrost

The TP is underlain by ~1.4 million km<sup>2</sup> of permafrost, ~75% of the total in China. The permafrost existence requires an average annual temperature between –0.5°C and –0.3°C and they are highly susceptible to global and regional climate change (Yang *et al.* 2010). The thickness of the TP permafrost varies spatially from 1 m to 130 m, depending on geography, biophysical components and climatic factors (Cheng 1997).

As a result of rising temperature globally, extensive permafrost degradation on the plateau has been reported during the past decades. In total, the TP has lost almost 10% of its permafrost during the last decade (Qiu 2008). The hydrological model simulated 8.8% of permafrost reduction within elevation range of 3500–3900 m during 1971–2013 (Gao *et al.* 2017). The fastest permafrost degradation occurred as being deepened by 0.032 m per decade. On average, the seasonally frozen soil layer showed a submerging trend of 0.032 m per decade, and the active layer thickness increased by 0.043 m per decade (Gao *et al.* 2017).

Numerous studies based on observational data has confirmed the warming trend over the plateau (mostly in the central, eastern and northwestern), and the trend is predicted to continue into the 21st century (Li and Cheng 1999). The fast temperature increment would further exacerbate TP permafrost degradation. Due to the relatively high population density on the TP, effects of human activities on permafrost is more intensive on the TP than in the Arctic and subarctic soils (Yang *et al.* 2010). It has been observed that the southern limit of permafrost has shifted by 16 km northward while northern limit moved by 2 km southward under the combined effects of human activities and climate changes (Cheng *et al.* 1993).

The permafrost degradation caused an ensemble of environmental consequences such as land subsidence, soil erosion, and grassland degradation (Qin *et al.* 2006). The permafrost degradation also influences the interactions between land surface and atmosphere and disrupts the energy–water balance on the terrestrial land (Walvoord and Striegl 2007). Understanding permafrost variations and its consequences on regional hydrological processes is integral for sustainable management of water resources and ecosystem management in this cold region. Previous related studies still contains plenty of uncertainties, which open grounds for improving our understanding on its current spatial and temporal characteristics, also its future variations and their effects on regional environments (Gao *et al.* 2017). In the future studies, permafrost thawing and its effects on soil carbon storage need further studies. Organic carbon is mainly preserved in soil on the TP. Whether permafrost thawing causes carbon emission or sink is still illusive. The second pressing matter about permafrost research is to couple ecosystem process model with permafrost dynamics model. Only with their tight coupling, can we improve the prediction of ecosystem status as caused by permafrost changes. Third, novelty soil penetration technology should be introduced into permafrost depth and dynamics monitoring, especially for the edge zone where permafrost is distributed.

### Lake dynamics and its response to climate change

The inland lake surface areas and water volume on the TP are strong indicators of hydrological cycles and regional climate changes. Interactions of hydrological processes and climates influence the water budget of these lakes seasonally and annually. The TP contains >1500 lakes, and the lake areas on the TP accounts for 49% of the total in China (Ma *et al.* 2010). The TP lakes are the primary water sources of the region and several other major outflowing rivers. Periodic monitoring of these resources is essential (Lei *et al.* 2014).

The water balance of the TP lakes is highly responsive to climate change, in particular to temperature, precipitation, evaporation, and duration of solar radiation (Yao *et al.* 2010). Due to the warming and wetting on the TP in the last 50 years, one-third of the TP lakes have expanded and vast area of dryland has submerged under lakes (Dong *et al.* 2018). Different factors determine the interannual and seasonal lake area dynamics. For example lakes are affected primarily by East Asian monsoon and subtropical westerlies in summer, while by dry and cold westerlies during winter (Yao *et al.* 2012a).

Precipitation has not been an unusual factor in increasing lake water level in the north and east regions. The reason lies in that evaporation rate is three times higher than precipitation in these regions. So expanded lakes size is also subject to glacier melting and permafrost degradation (Zhang *et al.* 2017b). Due to less precipitation and high evaporation in northern Changtang Plateau, numerous lakes have shrunk or completely disappeared because of their total dependency on seasonal snowpack and snowmelt. The alpine lakes on

the high altitudes are mostly sustained by melting glaciers/snowpack and meltwater, which render them vulnerable to climate change (Lin *et al.* 2018). Furthermore, the spatial and temporal responses of the TP lakes are varied due to their nonhomogeneous climatic conditions and locations within distinct biomes (Song *et al.* 2014a). Lake area growth in the TP Interior (TPI) during late 1990s was found to be completely associated with the changing climate (Lei *et al.* 2014).

The lake expansion or shrinkage have caused various ecological and hydrological consequences, such as glacial lake outburst flow and flooding across the TP. The glaciers melting and accelerated snow thawing caused by increasing temperature has modified lake environment, which in turn alters hydrology and biochemical settings of the river discharges and runoff (Lin *et al.* 2018).

The complex topography of the TP makes it difficult to conduct in situ observations on lake variations. The reason behind decreasing water levels in the lakes of southern TP, even with increased rates of glacier melting in Himalayas, still remains unclear (Kehrwald *et al.* 2008). Therefore, space borne satellite remote sensing and optical photogrammetry are entailed to monitor lakes variations on a regular basis. Though many quantitative studies have been conducted on monitoring lake phenology, surface area change, and water balances, information associating them with climate change is still lacking (Sadia *et al.* 2018). Timely monitoring and predicting the lake phenology on the entire TP is crucial for safe and sustainable development of regional economy, also for policy makers in sustaining the environment safety of this remote area (Yang *et al.* 2018).

## CLIMATE EFFECTS ON VEGETATION

### Response of vegetation phenology to climate change

The TP is mainly covered by vegetation of alpine grasslands and meadows (Bingrong *et al.* 2006; Pu *et al.* 2007), which are very sensitive to climate dynamics and an ideal bioindicator of climate change (Ding *et al.* 2013). Plant phenology is one important and convenient parameter indicating plant species responses to interannual climate change (Rosenzweig *et al.* 2007). It can be inferred from agricultural practices, animal husbandry, forestry, industries, tourism and so on (Beaubien and Freeland 2000; Gilbert *et al.* 2006; Rauste *et al.* 2007). Moreover, it has been observed by various studies, particularly on the TP that plant phenology can influence pasturage, on which livestock depends (Ding *et al.* 2007; Xue *et al.* 2005; Fig. 4).

The delayed green-up date has been monitored during 2000–11 in the southwestern TP, caused by rising preseasonal temperature and reduced preseasonal precipitation (Shen *et al.* 2014). This study revealed the significant precipitation effects on the alpine spring vegetation phenology. Other studies reported that enhanced preseasonal precipitation on the TP may delay starting of season (SOS) of alpine grassland and tundra due to its cooling effect (Piao *et al.* 2006; Shen

*et al.* 2014). Findings from each study varied due to their distinct targeted periods or data sources employed (Table 2). At a community level, various plant species of a community demonstrate different phenological responses toward climatic variations, resulting in modified species composition (CaraDonna *et al.* 2014; Cleland *et al.* 2007). Other ecological processes, including trophic incongruity and pollinator–host disagreement, can further be influenced (Kerby and Post 2013).

Precipitation as rainfall or snow fall plays a great role in sustainable vegetation growth (Dorji *et al.* 2013). Temperature and precipitation profoundly interact with snow cover and exert effects on alpine vegetation phenology (Qin *et al.* 2006; Rammig *et al.* 2010; Wang *et al.* 2016a). Especially at high elevated regions, snow cover dynamics is deeply associated with the shifting of spring phenology (Wang *et al.* 2017). Besides spring temperature and precipitation, the chilling winter, photoperiod and degrading permafrost also effects the life cycle of green vegetation on the TP (Wang *et al.* 2017).

For a short-time period, vegetation phenological changes would affect the geomorphology, as well as biophysical processes and land surface parameters, such as albedo, evapotranspiration, energy budget and eventually regional climates (Babel *et al.* 2014; Jeong *et al.* 2009). Large scale changes in vegetation growing season could also bring drastic variations in biogeochemistry of soil environment through variations in carbon fluxes and trophic levels' energy flow (Peñuelas and Filella 2009). Peculiar to the TP, it is not yet known how altered spring vegetation phenology affects surface heat intensity, then further feedback to climates. Remarkable warming on the TP is likely to inhibit the growth of alpine grassland and probably increases the atmospheric aridity. It is reported that vapor pressure deficit is projected to increase by 10–38% on the plateau in the future and this would further increase the atmospheric drought pressure on the Tibetan alpine grasslands and cause anisohydricity in Tibetan grasslands (Gao *et al.* 2015a).

Remote sensing data have been increasingly applied in addressing vegetation phenology dynamics on the TP. But findings generated by differed data present a certain inconsistency. To understand the response mechanism of the TP vegetation phenology, future studies should increasingly collect field observations, including specific phenology monitoring network and other useful information related to phenology (e.g. carbon fluxes network). Second, remote sensing monitoring results are better to be integrated with other heat requirement models to predict phenology dynamics. Third, precipitation frequency and timing, and accumulated temperature need to be integrated to address their combined effects on vegetation phenology.

### Climatic effects on vegetation productivity

Ecosystem productivity holds great value to ecosystem carbon cycle. Increasing temperature and precipitation extensively affects ecosystem productivity on the plateau. Increasing temperature influences physiological activities like photosynthesis

**Table 2:** spatiotemporal vegetation phenological changes on Tibetan Plateau

| SR | Period    | Data type                | SOS                                                | EOS                         | LOS                              | Region          | Reference                      |
|----|-----------|--------------------------|----------------------------------------------------|-----------------------------|----------------------------------|-----------------|--------------------------------|
| 1  | 1999–2009 | SPOT-VGT                 | Earlier<br>6 days/decade                           | Delayed by<br>2 days/decade | Lengthened by<br>8 days/decade   | TP              | Jin <i>et al.</i> (2013)       |
| 2  | 1989–2008 | GIMMS                    | Advanced<br>4.6–9.9 days                           | Delayed<br>7.3–10.5 days    | —                                | TP              | Jin <i>et al.</i> (2013)       |
| 3  | 1982–2011 | GIMMS                    | —                                                  | Delayed<br>0.7day/decade    | —                                | TP              | Cong <i>et al.</i> (2016)      |
| 4  | 1983–2012 | GIMMS                    | 52.21%                                             | 34.30%                      | —                                | TP              | Wang <i>et al.</i> (2017)      |
| 5  | 2000–16   | MODIS                    | Advanced<br>1.4 days/decade                        | —                           | —                                | Northeastern TP | Li <i>et al.</i> (2017)        |
| 6  | 1982–2014 | NOAA/AVHRR               | Advanced                                           | Delayed                     | Increased                        | TP              | Cheng <i>et al.</i> (2018)     |
| 7  | 1960–2013 | Temperature<br>and MODIS | Advanced by<br>1.42 days/decade<br>using temp data | 6.04 days/decade<br>MODIS   | —                                | TP              | Yu <i>et al.</i> (2018)        |
| 8  | 1960–2014 | —                        | —                                                  | —                           | —                                | TP              | He <i>et al.</i> (2018)        |
| 9  | 1982–2013 | AVHRR                    | Advanced 2–3 days/decade                           | Delayed 1–2 days/decade     | Lengthened by<br>1–2 days/decade | TP              | Zhang <i>et al.</i><br>(2018a) |

Abbreviations: SOS = start of growing season, EOS = end of growing season, LOS = length of growing season.



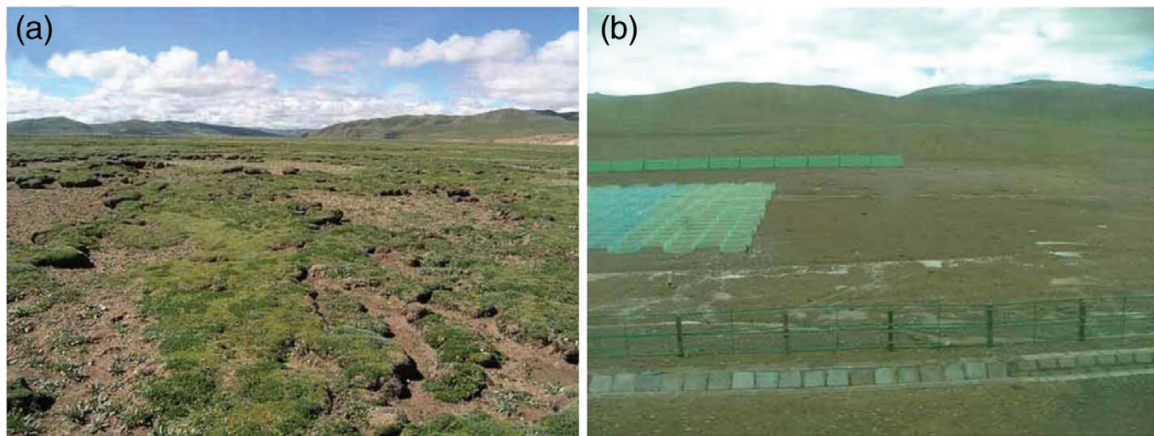

**Figure 4:** forms of rangeland degradation in representative geographic regions on the TP. (a) Alpine meadow degradation in South Qinghai; (b) Alpine steppe degradation near a major highway in Northern Tibet (Li et al. 2013).

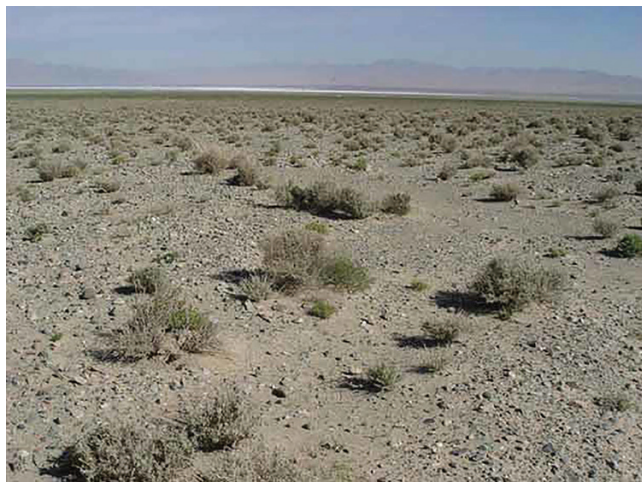

**Figure 5:** grassland degradation in the Qaidam Basin (Li et al. 2013).

and respiration (Ganjurjav et al. 2015; Hu et al. 2016; Wu et al. 2011), so does precipitation (Angert et al. 2005). They eventually accelerate plant growth, and the magnitude varies with respective ecosystem types (Craine et al. 2012; Davi et al. 2006; Oberbauer et al. 2007; Sage and Kubien 2007; Zhang et al. 2018b). Generally, increased temperature causes higher NPP for the alpine ecosystem, but the effects differ with plant species (Li et al. 2018c; Rustad et al. 2001). Carbon fluxes in the active growing seasons are also greatly influenced by water stress for the alpine ecosystem (Zhang et al. 2018b).

Due to its value in providing basic surviving materials for humans, NPP can also be considered as a significant socioeconomic well-being indicator. Based on economic losses attributed to reduced alpine grassland growth, the direct loss caused by decreased NPP on the Plateau was estimated to be \$2.44 billion in 2008 (Wen et al. 2013). Aggravated grassland degradation on the TP significantly shrink its ecosystem service capacity (Li et al. 2018a; Fig. 5). The grassland degradation can be caused by overgrazing, climate change, wind

and rain erosion and rodents (Chen et al. 2014; Marston et al. 2014; Shang and Long 2007). The future studies about ecosystem productivity on the TP need to overcome the following restrictions. First, model parameter needs to be optimized using field collected data to increase model accuracies. Second, studies on belowground vegetation parts need to be strengthened. The belowground part accounts for a significant proportion of the alpine ecosystem, but its productivity and annual flux has still plenty of uncertainties.

## FUTURE RESEARCH DIRECTIONS

Under the ongoing climate change, changed vegetation status would bring about profound impacts on the related surface processes such as, surface albedo, soil moisture and energy cycles, thereby providing feedback to climates (Notaro and Liu 2008). Due to its high altitude and large body size, influences of the TP on climates can be further amplified. Considering its environmental and ecological significances and our knowledge gap, the following pursuit avenues for ecological and environmental research were teased out:

1. Integration of multiple research methods: remote sensing and field observation entail to be assembled seamlessly and observation needs to be structured from field to low sky and then to high sky satellite remote sensing.
2. Field observation network: considering sparsely distributed long-term field observation sites, more efforts are required for constructing long-term field observation network along environmental gradient.
3. Model parameter optimization: the TP possesses many unique environmental and ecological features, which underlines that parameter values on other systems are not applicable. Then locally optimizing model parameters are necessary before being utilized.
4. Strengthening interdisciplinary study: the TP is a typical region where cryospheric system, biospheric system,

hydrospheric system and ecosystem interact. Investigation on one sole system is hard to explain the core processes and mechanisms. Only interdisciplinary cooperation can advance our comprehensive understanding on interactions among each system.

## FUNDING

This study was supported by the 'Strategic Priority Research Program' of Chinese Academy of Sciences (XDA20050102) and the National Science Fund for Distinguished Young Scholars of China (41725003). This work was also funded by the National Natural Science Foundation of China (41571195). This work was funded by a Science and Technology Project of State Grid Corporation of China (SGxzzlwzhhbGCJS1700095).

## ACKNOWLEDGEMENTS

The author pays special thanks to Mr Zeeshan Ali for his contribution in making graphical abstract. The author is also grateful to Dr Asif Mahmood for editing article and his strong encouragement and moral support during the whole process of writing this review article. The author is thankful to Mr Muhammad Aqeel Kamran for his ideas sharing regards writing review article.

*Conflict of interest statement.* None declared.

## REFERENCES

- Agarwal T (2009) Concentration level, pattern and toxic potential of PAHs in traffic soil of Delhi, India. *J Hazard Mater* **171**:894–900.
- Aldenderfer M (2011) Peopling the Tibetan Plateau: insights from archaeology. *High Alt Med Biol* **12**:141–7.
- Angert A, Biraud S, Bonfils C, *et al.* (2005) Drier summers cancel out the CO<sub>2</sub> uptake enhancement induced by warmer springs. *Proc Natl Acad Sci USA* **102**:10823–7.
- Aoki T, Kuchiki K, Niwano M, *et al.* (2011) Physically based snow albedo model for calculating broadband albedos and the solar heating profile in snowpack for general circulation models. *J Geophys Res Atmos* **116**:D11114.
- Babel W, Biermann T, Coners H, *et al.* (2014) Pasture degradation modifies the water and carbon cycles of the Tibetan highlands. *Biogeosciences* **11**:6633–56.
- Bai A, Liu C, Liu X (2008) Diurnal variation of summer rainfall over the Tibetan Plateau and its neighboring regions revealed by TRMM multi-satellite precipitation analysis. *Chin J Geophys* **51**:704–14.
- Beaubien EG, Freeland HJ (2000) Spring phenology trends in Alberta, Canada: links to ocean temperature. *Int J Biometeorol* **44**:53–9.
- Bingrong Z, Fengxia L, Shuanghe S (2006) Gradual differentiating model for snow calamity in Qinghai-Tibet Plateau. *Chin J Agrometeorol* **27**:210–4.
- CaraDonna PJ, Iler AM, Inouye DW (2014) Shifts in flowering phenology reshape a subalpine plant community. *Proc Natl Acad Sci USA* **111**:4916–21.
- Chen FH, Dong GH, Zhang DJ, *et al.* (2015) Agriculture facilitated permanent human occupation of the Tibetan Plateau after 3600 B.P. *Science* **347**:248–50.
- Chen B, Zhang X, Tao J, *et al.* (2014) The impact of climate change and anthropogenic activities on alpine grassland over the Qinghai-Tibet Plateau. *Agric For Meteorol* **189**:11–8.
- Cheng G (1997) *The Effect Assessment of the Climate Change on the Snow Cover, Glacier and Frozen Soil in China*. Lanzhou: Gansu Cultural Press.
- Cheng G, Huang X, Kang X (1993) Recent permafrost degradation along the Qinghai-Tibet highway. In: *Proceedings: 6th International Conference on Permafrost, Beijing, China*. vol. **2**, p. 1010–3. July 5–9, 1993. China, Mainland: Guangzhou, South China University of Technology Press.
- Cheng M, Jin J, Zhang J, *et al.* (2018) Effect of climate change on vegetation phenology of different land-cover types on the Tibetan Plateau. *Int J Remote Sens* **39**:470–87.
- Chung MG, Pan T, Zou X, *et al.* (2018) Complex interrelationships between ecosystem services supply and tourism demand: general framework and evidence from the origin of three Asian Rivers. *Sustainability* **10**:4576.
- Cleland EE, Chuine I, Menzel A, *et al.* (2007) Shifting plant phenology in response to global change. *Trends Ecol Evol* **22**:357–65.
- Cong N, Shen M, Piao S (2016) Spatial variations in responses of vegetation autumn phenology to climate change on the Tibetan Plateau. *J Plant Ecol* **10**:744–52.
- Craine JM, Nippert JB, Elmore AJ, *et al.* (2012) Timing of climate variability and grassland productivity. *Proc Natl Acad Sci USA* **109**:3401–5.
- Dai A (2013) Increasing drought under global warming in observations and models. *Nat Clim Change* **3**:52–8.
- Davi H, Dufrêne E, Francois C, *et al.* (2006) Sensitivity of water and carbon fluxes to climate changes from 1960–2100 in European forest ecosystems. *Agric For Meteorol* **141**:35–56.
- Ding L, Long R, Yang Y, *et al.* (2007) Behavioural responses by yaks in different physiological states (lactating, dry or replacement heifers), when grazing natural pasture in the spring (dry and germinating) season on the Qinghai-Tibetan Plateau. *Appl Anim Behav Sci* **108**:239–50.
- Ding M, Zhang Y, Sun X, *et al.* (2013) Spatiotemporal variation in alpine grassland phenology in the Qinghai-Tibetan Plateau from 1999 to 2009. *Chin Sci Bull* **58**:396–405.
- Dong S, Peng F, You Q, *et al.* (2018) Lake dynamics and its relationship to climate change on the Tibetan Plateau over the last four decades. *Reg Environ Change* **18**:477–87.
- Dorji T, Totland O, Moe SR, *et al.* (2013) Plant functional traits mediate reproductive phenology and success in response to experimental warming and snow addition in Tibet. *Glob Change Biol* **19**:459–72.
- Duan AM, Wu GX (2005) Role of the Tibetan Plateau thermal forcing in the summer climate patterns over subtropical Asia. *Clim Dyn* **24**:793–807.
- Duan A, Wu G (2006) Change of cloud amount and the climate warming on the Tibetan Plateau. *Geophys Res Lett* **33**:L22704.
- Duan A, Wu G, Zhang Q, *et al.* (2006) New proofs of the recent climate warming over the Tibetan Plateau as a result of the increasing greenhouse gases emissions. *Chin Sci Bull* **51**:1396–400.
- Faillietaz J, Funk M, Vincent C (2015) Avalanching glacier instabilities: review on processes and early warning perspectives. *Rev Geophys* **53**:203–24.

- Fang K, Makkonen R, Guo Z, et al. (2015) An increase in the biogenic aerosol concentration as a contributing factor to the recent wetting trend in Tibetan Plateau. *Sci Rep* **5**:14628.
- Feng Y, Wu J, Zhang J, et al. (2017) Identifying the relative contributions of climate and grazing to both direction and magnitude of alpine grassland productivity dynamics from 1993–2011 on the Northern Tibetan Plateau. *Rem Sens* **9**:136.
- Flanner MG, Zender CS, Randerson JT, et al. (2007) Present-day climate forcing and response from black carbon in snow. *J Geophys Res Atmos* **112**:D11202.
- Frauenfeld OW, Zhang TJ, Serreze MC (2005) Climate change and variability using European centre for medium-range weather forecasts reanalysis (era-40) temperatures on the Tibetan Plateau. *J Geophys Res Atmos* **110**:D02101.
- Fujinami H, Yasunari T (2001) The seasonal and intraseasonal variability of diurnal cloud activity over the Tibetan Plateau. *J Meteorol Soc Japan Ser II* **79**:1207–27.
- Ganjurjav H, Gao Q, Zhang W, et al. (2015) Effects of warming on CO<sub>2</sub> fluxes in an Alpine Meadow Ecosystem on the Central Qinghai-Tibetan Plateau. *PLoS ONE* **10**:e0132044.
- Gao Y, Li X, Leung LR, et al. (2015a) Aridity changes in the Tibetan Plateau in a warming climate. *Environ Res Lett* **10**:034013.
- Gao Y, Xu J, Chen D (2015b) Evaluation of WRF mesoscale climate simulations over the Tibetan Plateau during 1979–2011. *J Climate* **28**:2823–41.
- Gao B, Yang D, Qin Y, et al. (2017) Change in frozen soils and its effect on regional hydrology in the Upper Heihe Basin, the Northeast Qinghai-Tibetan Plateau. *Cryosphere Discuss*. doi:10.5194/tc-2016-289
- Garonna I, de Jong R, Schaepman ME (2016) Variability and evolution of global land surface phenology over the past three decades (1982–2012). *Glob Change Biol* **22**:1456–68.
- Gilbert M, Xiao X, Domenech J, et al. (2006) Anatidae migration in the western Palearctic and spread of highly pathogenic avian influenza H5NI virus. *Emerg Infect Dis* **12**:1650–6.
- Guo DL, Wang HJ (2012) The significant climate warming in the Northern Tibetan Plateau and its possible causes. *Int J Climatol* **32**:1775–81.
- Guo H, Wang X, Wang T, et al. (2018) Spring snow-albedo feedback analysis over the third pole: results from satellite observation and CMIP5 model simulations. *J Geophys Res Atmos* **123**:750–63.
- Haerberli W, Schaub Y, Huggel C (2017) Increasing risks related to landslides from degrading permafrost into new lakes in de-glaciating mountain ranges. *Geomorphology* **293**:405–17.
- He M, Yang B, Shishov V, et al. (2018) Projections for the changes in growing season length of tree-ring formation on the Tibetan Plateau based on CMIP5 model simulations. *Int J Biometeorol* **62**:631–41.
- Hu Y, Jiang L, Wang S, et al. (2016) The temperature sensitivity of ecosystem respiration to climate change in an alpine meadow on the Tibet Plateau: a reciprocal translocation experiment. *Agric For Meteorol* **216**:93–104.
- Jeong S, Ho C, Kim K, et al. (2009) Reduction of spring warming over East Asia associated with vegetation feedback. *Geophys Res Lett* **36**:L18705.
- Jin Z, Zhuang Q, He JS, et al. (2013) Phenology shift from 1989 to 2008 on the Tibetan Plateau: an analysis with a process-based soil physical model and remote sensing data. *Clim Change* **119**:435–49.
- Kehrwald NM, Thompson LG, Tandong Y, et al. (2008) Mass loss on Himalayan glacier endangers water resources. *Geophys Res Lett* **35**:L22503.
- Kerby JT, Post E (2013) Advancing plant phenology and reduced herbivore production in a terrestrial system associated with sea ice decline. *Nat Commun* **4**:2514.
- Kuang X, Jiao JJ (2016) Review on climate change on the Tibetan Plateau during the last half century. *J Geophys Res Atmos* **121**:3979–4007.
- Lee W, Bhawar RL, Kim M, et al. (2013) Study of aerosol effect on accelerated snow melting over the Tibetan Plateau during boreal spring. *Atmos Environ* **75**:113–22.
- Lei Y, Yang K, Wang B, et al. (2014) Response of inland lake dynamics over the Tibetan Plateau to climate change. *Clim Change* **125**:281–90.
- Li X, Cheng G (1999) A GIS-aided response model of high-altitude permafrost to global change. *Sci China Ser D Earth Sci* **42**:72–9.
- Li X, Gao J, Brierley G, et al. (2013) Rangeland degradation on the Qinghai-Tibet Plateau: implications for rehabilitation. *Land Degrad Dev* **24**:72–80.
- Li X, Gao J, Zhang J, et al. (2018a) Natural and anthropogenic influences on the spatiotemporal change of degraded meadows in southern Qinghai province, West China: 1976–2015. *Appl Geogr* **97**:176–83.
- Li G, Jiang G, Bai J, et al. (2017) Spatio-temporal variation of alpine grassland spring phenological and its response to environment factors northeastern of Qinghai-Tibetan Plateau during 2000–2016. *Arab J Geosci* **10**:480.
- Li C, Su F, Yang D, et al. (2018b) Spatiotemporal variation of snow cover over the Tibetan Plateau based on MODIS snow product, 2001–2014. *Int J Climatol* **38**:708–28.
- Li Q, Xue Y (2010) Simulated impacts of land cover change on summer climate in the Tibetan Plateau. *Environ Res Lett* **5**:015102.
- Li C, Yanai M (1996) The onset and interannual variability of the Asian summer monsoon in relation to land–sea thermal contrast. *J Clim* **9**:358–75.
- Li L, Zhang Y, Liu L, et al. (2018c) Current challenges in distinguishing climatic and anthropogenic contributions to alpine grassland variation on the Tibetan Plateau. *Ecol Evol* **8**:5949–63.
- Li C, de Jong R, Schmid B, et al. (2019) Spatial variation of human influences on grassland biomass on the Qinghai-Tibetan plateau. *Sci Total Environ* **665**:678–89.
- Lin X, Rioual P, Peng W, et al. (2018) Impact of recent climate change on Lake Kanas, Altai Mountains (NW China) inferred from diatom and geochemical evidence. *J Paleolimnol* **59**:461–77.
- Liu X, Chen B (2000) Climatic warming in the Tibetan Plateau during recent decades. *Int J Climatol* **20**:1729–42.
- Liu H, Sun Z, Wang J, et al. (2004) A modeling study of the effects of anomalous snow cover over the Tibetan Plateau upon the South Asian summer monsoon. *Adv Atmos Sci* **21**:964–75.
- Liu Z, Yang M, Wan G, et al. (2017) The spatial and temporal variation of temperature in the Qinghai-Xizang (Tibetan) Plateau during 1971–2015. *Atmosphere* **8**:214.
- Liu X, Zheng H, Zhang M, et al. (2011) Identification of dominant climate factor for pan evaporation trend in the Tibetan Plateau. *J Geogr Sci* **21**:594–608.

- Ma R, Duan H, Hu C, *et al.* (2010) A half-century of changes in China's lakes: global warming or human influence? *Geophys Res Lett* **37**:L24106.
- Ma Y, Tang G, Long D, *et al.* (2016) Similarity and error intercomparison of the GPM and its predecessor-TRMM multisatellite precipitation analysis using the best available hourly gauge network over the Tibetan Plateau. *Rem Sens* **8**:569.
- Ma L, Qin D, Bian L, *et al.* (2011) Assessment of snow cover vulnerability over the Qinghai-Tibetan Plateau. *Adv Clim Change Res* **2**:93–100.
- Maclean N (2009) *A River Runs through It and Other Stories*. Chicago, IL: University of Chicago Press.
- Marston CG, Danson FM, Armitage RP, *et al.* (2014) A random forest approach for predicting the presence of *Echinococcus multilocularis* intermediate host *Ochotona* spp. presence in relation to landscape characteristics in western China. *Appl Geogr* **55**:176–83.
- Menon S, Koch D, Beig G, *et al.* (2010) Black carbon aerosols and the third polar ice cap. *Atmos Chem Phys* **10**:4559–71.
- Moors EJ, Groot A, Biemans H, *et al.* (2011) Adaptation to changing water resources in the Ganges basin, northern India. *Environ Sci Policy* **14**:758–69.
- Morissette JT, Richardson AD, Knapp AK, *et al.* (2009) Tracking the rhythm of the seasons in the face of global change: phenological research in the 21st century. *Front Ecol Environ* **7**:253–60.
- Notaro M, Liu Z (2008) Statistical and dynamical assessment of vegetation feedbacks on climate over the boreal forest. *Clim Dyn* **31**:691–712.
- Oberbauer SF, Tweedie CE, Welker JM, *et al.* (2007) Tundra CO<sub>2</sub> fluxes in response to experimental warming across latitudinal and moisture gradients. *Ecol Monogr* **77**:221–38.
- Peñuelas J, Filella I (2009) Phenology feedbacks on climate change. *Science* **324**:887–8.
- Peñuelas J, Rutishauser T, Filella I (2009) Ecology. Phenology feedbacks on climate change. *Science* **324**:887–8.
- Piao S, Fang J, Zhou L, *et al.* (2006) Variations in satellite-derived phenology in China's temperate vegetation. *Glob Change Biol* **12**:672–85.
- Pu Z, Xu L, Salomonson VV (2007) Modis/terra observed seasonal variations of snow cover over the Tibetan Plateau. *Geophys Res Lett* **34**:L06706.
- Qin DH, Liu SY, Li PJ (2006) Snow cover distribution, variability, and response to climate change in western China. *J Clim* **19**:1820–33.
- Qin J, Yang K, Liang S, *et al.* (2009) The altitudinal dependence of recent rapid warming over the Tibetan Plateau. *Clim Change* **97**:321–7.
- Qiu J (2008) China: the third pole. *Nature* **454**:393–6.
- Qu X, Hall A (2014) On the persistent spread in snow-albedo feedback. *Clim Dyn* **42**:69–81.
- Rammig A, Jonas T, Zimmermann N, *et al.* (2010) Changes in alpine plant growth under future climate conditions. *Biogeosciences* **7**:2013–24.
- Rangwala I, Miller JR, Xu M, *et al.* (2009) Warming in the Tibetan Plateau: possible influences of the changes in surface water vapor. *Geophys Res Lett* **36**:L06703.
- Rauste Y, Astola H, Hame T, *et al.* (2007) Automatic monitoring of autumn colours using MODIS data. In: *Geoscience and Remote Sensing Symposium, 2007. IGARSS 2007*, p. 1295–8. IEEE International.
- Rittger K, Painter TH, Dozier J (2013) Assessment of methods for mapping snow cover from MODIS. *Adv Water Resour* **51**:367–80.
- Rosenzweig C, Casassa G, Karoly DJ, *et al.* (2007) Assessment of observed changes and responses in natural and managed systems. *Clim Change* **2007**:79–131.
- Rustad L, Campbell J, Marion G, *et al.* (2001) A meta-analysis of the response of soil respiration, net nitrogen mineralization, and aboveground plant growth to experimental ecosystem warming. *Oecologia* **126**:543–62.
- Sadia B, Wang L, Li X, *et al.* (2018) Climatic and associated cryospheric, biospheric, and hydrological changes on the Tibetan Plateau: a review. *Int J Climatol* **38**:e1–e17.
- Sage RF, Kubien DS (2007) The temperature response of C<sub>3</sub> and C<sub>4</sub> photosynthesis. *Plant Cell Environ* **30**:1086–106.
- Scherler D, Bookhagen B, Strecker MR (2011) Spatially variable response of Himalayan glaciers to climate change affected by debris cover. *Nat Geosci* **4**:156–9.
- Shang Z, Long R (2007) Formation causes and recovery of the “black soil type” degraded alpine grassland in Qinghai-Tibetan Plateau. *Front Agric China* **1**:197–202.
- Shen SS, Yao R, Ngo J, *et al.* (2015) Characteristics of the Tibetan Plateau snow cover variations based on daily data during 1997–2011. *Theor Appl Climatol* **120**:445–53.
- Shen M, Zhang G, Cong N, *et al.* (2014) Increasing altitudinal gradient of spring vegetation phenology during the last decade on the Qinghai-Tibetan Plateau. *Agric Forest Meteorol* **189**:71–80.
- Song C, Huang B, Ke L (2014a) Inter-annual changes of alpine inland lake water storage on the Tibetan Plateau: detection and analysis by integrating satellite altimetry and optical imagery. *Hydrol Process* **28**:2411–8.
- Song C, Pei T, Zhou C (2014b) The role of changing multiscale temperature variability in extreme temperature events on the eastern and central Tibetan Plateau during 1960–2008. *Int J Climatol* **34**:3683–701.
- Su F, Zhang L, Ou T, *et al.* (2016) Hydrological response to future climate changes for the major upstream river basins in the Tibetan Plateau. *Glob Planet Change* **136**:82–95.
- Sun Q, Miao C, Duan Q (2015) Projected changes in temperature and precipitation in ten river basins over China in 21st century. *Int J Climatol* **35**:1125–41.
- Tang Z, Wang J, Li H, *et al.* (2013a) Spatiotemporal changes of snow cover over the Tibetan Plateau based on cloud-removed moderate resolution imaging spectroradiometer fractional snow cover product from 2001–2011. *J Appl Rem Sens* **7**:073582.
- Tang Z, Wang J, Li H, *et al.* (2013b) Monitoring snow cover changes and their relationships with temperature over the Tibetan Plateau using MODIS data. In: *Geoscience and Remote Sensing Symposium (IGARSS)*, p. 1178–81. IEEE International.
- Thompson Lo, Yao T, Davis M, *et al.* (1997) Tropical climate instability: the last glacial cycle from a Qinghai-Tibetan ice core. *Science* **276**:1821–5.
- Tong K, Su F, Yang D, *et al.* (2014a) Evaluation of satellite precipitation retrievals and their potential utilities in hydrologic modeling over the Tibetan Plateau. *J Hydrol* **519**:423–37.
- Tong K, Su F, Yang D, *et al.* (2014b) Tibetan Plateau precipitation as depicted by gauge observations, reanalyses and satellite retrievals. *Int J Climatol* **34**:265–85.

- Trenberth KE (2011) Changes in precipitation with climate change. *Clim Res* **47**:123–38.
- Walvoord MA, Striegl RG (2007) Increased groundwater to stream discharge from permafrost thawing in the Yukon River basin: potential impacts on lateral export of carbon and nitrogen. *Geophys Res Lett* **34**:L12402.
- Wan G, Yang M, Liu Z, et al. (2017) The precipitation variations in the Qinghai-Xizang (Tibetan) Plateau during 1961–2015. *Atmosphere* **8**:80.
- Wang B, Bao Q, Hoskins B, et al. (2008) Tibetan Plateau warming and precipitation changes in East Asia. *Geophys Res Lett* **35**:L14702.
- Wang W, Liang T, Huang X, et al. (2013a) Early warning of snow-caused disasters in pastoral areas on the Tibetan Plateau. *Nat Hazards Earth Syst Sci* **13**:1411–25.
- Wang T, Peng S, Lin X, et al. (2013b) Declining snow cover may affect spring phenological trend on the Tibetan Plateau. *Proc Natl Acad Sci USA* **110**:E2854–5.
- Wang X, Yang M, Liang X, et al. (2014) The dramatic climate warming in the Qaidam Basin, northeastern Tibetan Plateau, during 1961–2010. *Int J Climatol* **34**:1524–37.
- Wang S, Wang T, Peng S, Otlé C, et al. (2015) Spring snow cover deficit controlled by intraseasonal variability of the surface energy fluxes. *Environ Res Lett* **10**:024018.
- Wang S, Wang X, Chen G, et al. (2017) Complex responses of spring alpine vegetation phenology to snow cover dynamics over the Tibetan Plateau, China. *Sci Total Environ* **593–594**:449–61.
- Wang G, Wang Y, Li Y, et al. (2007) Influences of alpine ecosystem responses to climatic change on soil properties on the Qinghai-Tibet Plateau, China. *Catena* **70**:506–14.
- Wang S, Yang B, Yang Q, et al. (2016a) Temporal trends and spatial variability of vegetation phenology over the Northern Hemisphere during 1982–2012. *PLOS ONE* **11**:e0157134.
- Wang Z, Zhang Y, Yang Y, et al. (2016b) Quantitative assess the driving forces on the grassland degradation in the Qinghai-Tibet Plateau, in China. *Ecol Inform* **33**:32–44.
- Wen L, Dong S, Li Y, et al. (2013) Effect of degradation intensity on grassland ecosystem services in the alpine region of Qinghai-Tibetan Plateau, China. *PLOS ONE* **8**:e58432.
- Wu Z, Dijkstra P, Koch GW, et al. (2011) Responses of terrestrial ecosystems to temperature and precipitation change: a meta-analysis of experimental manipulation. *Glob Change Biol* **17**:927–42.
- Wu S, Yin Y, Zheng D, et al. (2007) Climatic trends over the Tibetan Plateau during 1971–2000. *J Geogr Sci* **17**:141–51.
- Xie H, Zhu X (2013) Reference evapotranspiration trends and their sensitivity to climatic change on the Tibetan Plateau (1970–2009). *Hydrol Process* **27**:3685–93.
- Xie H, Zhu X, Yuan DY (2015) Pan evaporation modelling and changing attribution analysis on the Tibetan Plateau (1970–2012). *Hydrol Process* **29**:2164–77.
- Xu Z, Gong T, Li J (2008a) Decadal trend of climate in the Tibetan Plateau-regional temperature and precipitation. *Hydrol Process* **22**:3056–65.
- Xu X, Lu C, Shi X, et al. (2008b) World water tower: an atmospheric perspective. *Geophys Res Lett* **35**:L20815.
- Xu Y, Ramanathan V, Washington W (2015) Observed high-altitude warming and snow cover retreat over Tibet and the Himalayas enhanced by black carbon aerosols. *Atmos Chem Phys Discuss* **16**:1305–15.
- Xue B, Zhao XQ, Zhang YS (2005) Seasonal changes in weight and body composition of yak grazing on alpine-meadow grassland in the Qinghai-Tibetan Plateau of China. *J Anim Sci* **83**:1908–13.
- Yanai MH, Li CF, Song ZS (1992) Seasonal heating of the Tibetan Plateau and its effects on the evolution of the Asian Summer Monsoon. *J Meteorol Soc Japan* **70**:319–51.
- Yang J, Jiang L, Ménard CB, et al. (2015) Evaluation of snow products over the Tibetan Plateau. *Hydrol Process* **29**:3247–60.
- Yang K, Lu H, Yue S, et al. (2018) Quantifying recent precipitation change and predicting lake expansion in the Inner Tibetan Plateau. *Clim Change* **147**:149–63.
- Yang M, Nelson FE, Shiklomanov NI, et al. (2010) Permafrost degradation and its environmental effects on the Tibetan Plateau: a review of recent research. *Earth Sci Rev* **103**:31–44.
- Yang K, Wu H, Qin J, et al. (2014) Recent climate changes over the Tibetan Plateau and their impacts on energy and water cycle: a review. *Glob Planet Change* **112**:79–91.
- Yang M, Yao T, Gou X, et al. (2008) Precipitation distribution along the Qinghai-Xizang (Tibetan) highway, summer 1998. *Arct Antarct Alp Res* **40**:761–9.
- Yao T, Li Z, Yang W, et al. (2010) Glacial distribution and mass balance in the Yarlung Zangbo River and its influence on lakes. *Chin Sci Bull* **55**:2072–8.
- Yao T, Pu J, Lu A, et al. (2007) Recent glacial retreat and its impact on hydrological processes on the Tibetan Plateau, China, and surrounding regions. *Arct Antarct Alp Res* **39**:642–50.
- Yao T, Qin D, Shen Y, et al. (2013) Cryospheric changes and their impacts on regional water cycle and ecological conditions in the Qinghai-Tibetan Plateau. *Chin J Nat* **35**:179–86.
- Yao T, Thompson LG, Mosbrugger V, et al. (2012a) Third pole environment (TPE). *Environ Dev* **3**:52–64.
- Yao T, Thompson L, Yang W, et al. (2012b) Different glacier status with atmospheric circulations in Tibetan Plateau and surroundings. *Nat Clim Change* **2**:663–67.
- Yao T, Wang Y, Liu S, et al. (2004) Recent glacial retreat in high Asia in China and its impact on water resource in northwest China. *Sci China Ser D Earth Sci* **47**:1065–75.
- Yin Y, Wu S, Zhao D, et al. (2013) Modeled effects of climate change on actual evapotranspiration in different eco-geographical regions in the Tibetan Plateau. *J Geogr Sci* **23**:195–207.
- You Q, Fraedrich K, Ren G, et al. (2013) Variability of temperature in the Tibetan Plateau based on homogenized surface stations and reanalysis data. *Int J Climatol* **33**:1337–47.
- You Q, Kang S, Pepin N, et al. (2010) Climate warming and associated changes in atmospheric circulation in the eastern and central Tibetan Plateau from a homogenized dataset. *Glob Planet Change* **72**:11–24.
- You Q, Min J, Jiao Y, et al. (2016a) Observed trend of diurnal temperature range in the Tibetan Plateau in recent decades. *Int J Climatol* **36**:2633–43.
- You Q, Min J, Kang S (2016b) Rapid warming in the Tibetan Plateau from observations and CMIP5 models in recent decades. *Int J Climatol* **36**:2660–70.

- You Q, Min J, Zhang W, *et al.* (2015) Comparison of multiple datasets with gridded precipitation observations over the Tibetan Plateau. *Clim Dyn* **45**:791–806.
- Yu S, Xia J, Yan Z, *et al.* (2018) Changing spring phenology dates in the Three-Rivers headwater region of the Tibetan Plateau during 1960–2013. *Adv Atmos Sci* **35**:116–26.
- Yu C, Zhang Y, Zeng R, *et al.* (2012) Ecological and environmental issues faced by a developing Tibet. *Environ Sci Technol* **46**:1979–80.
- Zhang T (2007) Perspectives on environmental study of response to climatic and land cover/land use change over the Qinghai-Tibet Plateau: an introduction. *Arct Antarct Alp Res* **39**:631–4.
- Zhang D, Huang J, Guan X, *et al.* (2013) Long-term trends of precipitable water and precipitation over the Tibetan Plateau derived from satellite and surface measurements. *J Quant Spectrosc RA* **122**:64–71.
- Zhang Y, Kang S, Cong Z, *et al.* (2017a) Light-absorbing impurities enhance glacier albedo reduction in the southeastern Tibetan Plateau. *J Geophys Res Atmos* **122**:6915–33.
- Zhang Q, Kong D, Shi P, *et al.* (2018a) Vegetation phenology on the Qinghai-Tibetan Plateau and its response to climate change (1982–2013). *Agric For Meteorol* **248**:408–17.
- Zhang G, Xie H, Yao T, *et al.* (2012) Snow cover dynamics of four lake basins over Tibetan Plateau using time series MODIS data (2001–2010). *Water Resour Res* **48**:W10529.
- Zhang G, Yao T, Piao S, *et al.* (2017b) Extensive and drastically different alpine lake changes on Asia's high Plateaus during the past four decades. *Geophys Res Lett* **44**:252–60.
- Zhang G, Yao T, Xie H, *et al.* (2014) Estimating surface temperature changes of lakes in the Tibetan Plateau using MODIS 1st data. *J Geophys Res Atmos* **119**:8552–67.
- Zhang Y, Zhang W, Bai W, *et al.* (2005) An analysis of statistical data about Tibetan Plateau in China—a case study on population. *Prog Geogr* **24**:11–20.
- Zhang T, Zhang Y, Xu M, *et al.* (2018b) Water availability is more important than temperature in driving the carbon fluxes of an alpine meadow on the Tibetan Plateau. *Agric For Meteorol* **256**:22–31.
- Zhao Z, Zhang Y, Liu L, *et al.* (2015) Recent changes in wetlands on the Tibetan Plateau: a review. *J Geogr Sci* **25**:879–96.
- Zhu X, Wang W, Fraedrich K (2013) Future climate in the Tibetan Plateau from a statistical regional climate model. *J Clim* **26**:10125–38.
